# Supplementary figures and images for: Effect of Electroacupuncture on Short-Chain Fatty Acids in Peripheral Blood after Middle Cerebral Artery Occlusion/Reperfusion in Rats Based on Gas Chromatography–Mass Spectrometry
Source: Hindawi journal article supplement (doi:10.1155/2022/3997947), 2022-08-23

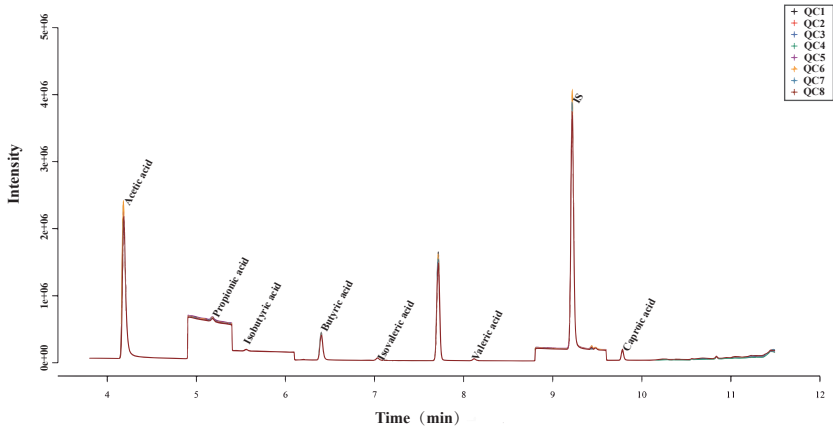

Supplement: f1 [file 3997947.f1.zip]

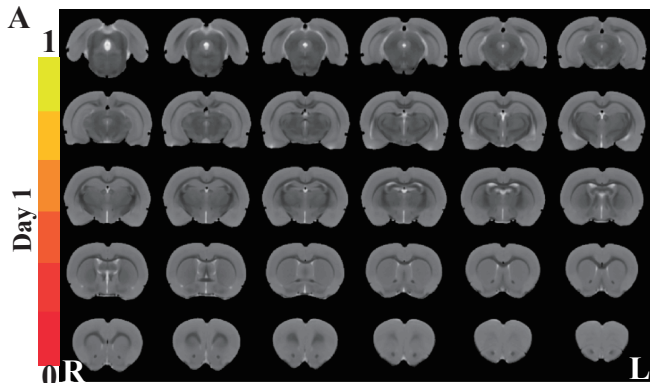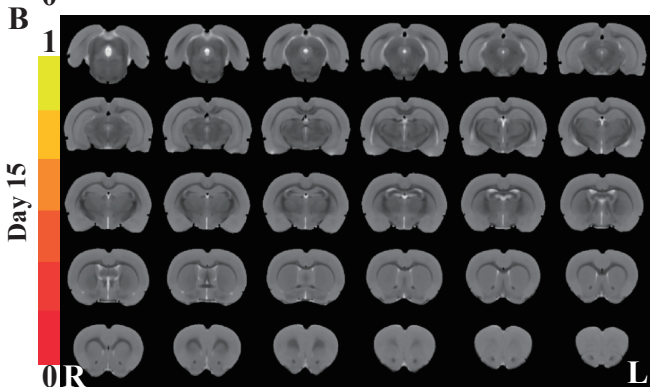

**Sham Group**

Supplement: f1 [file 3997947.f1.zip]

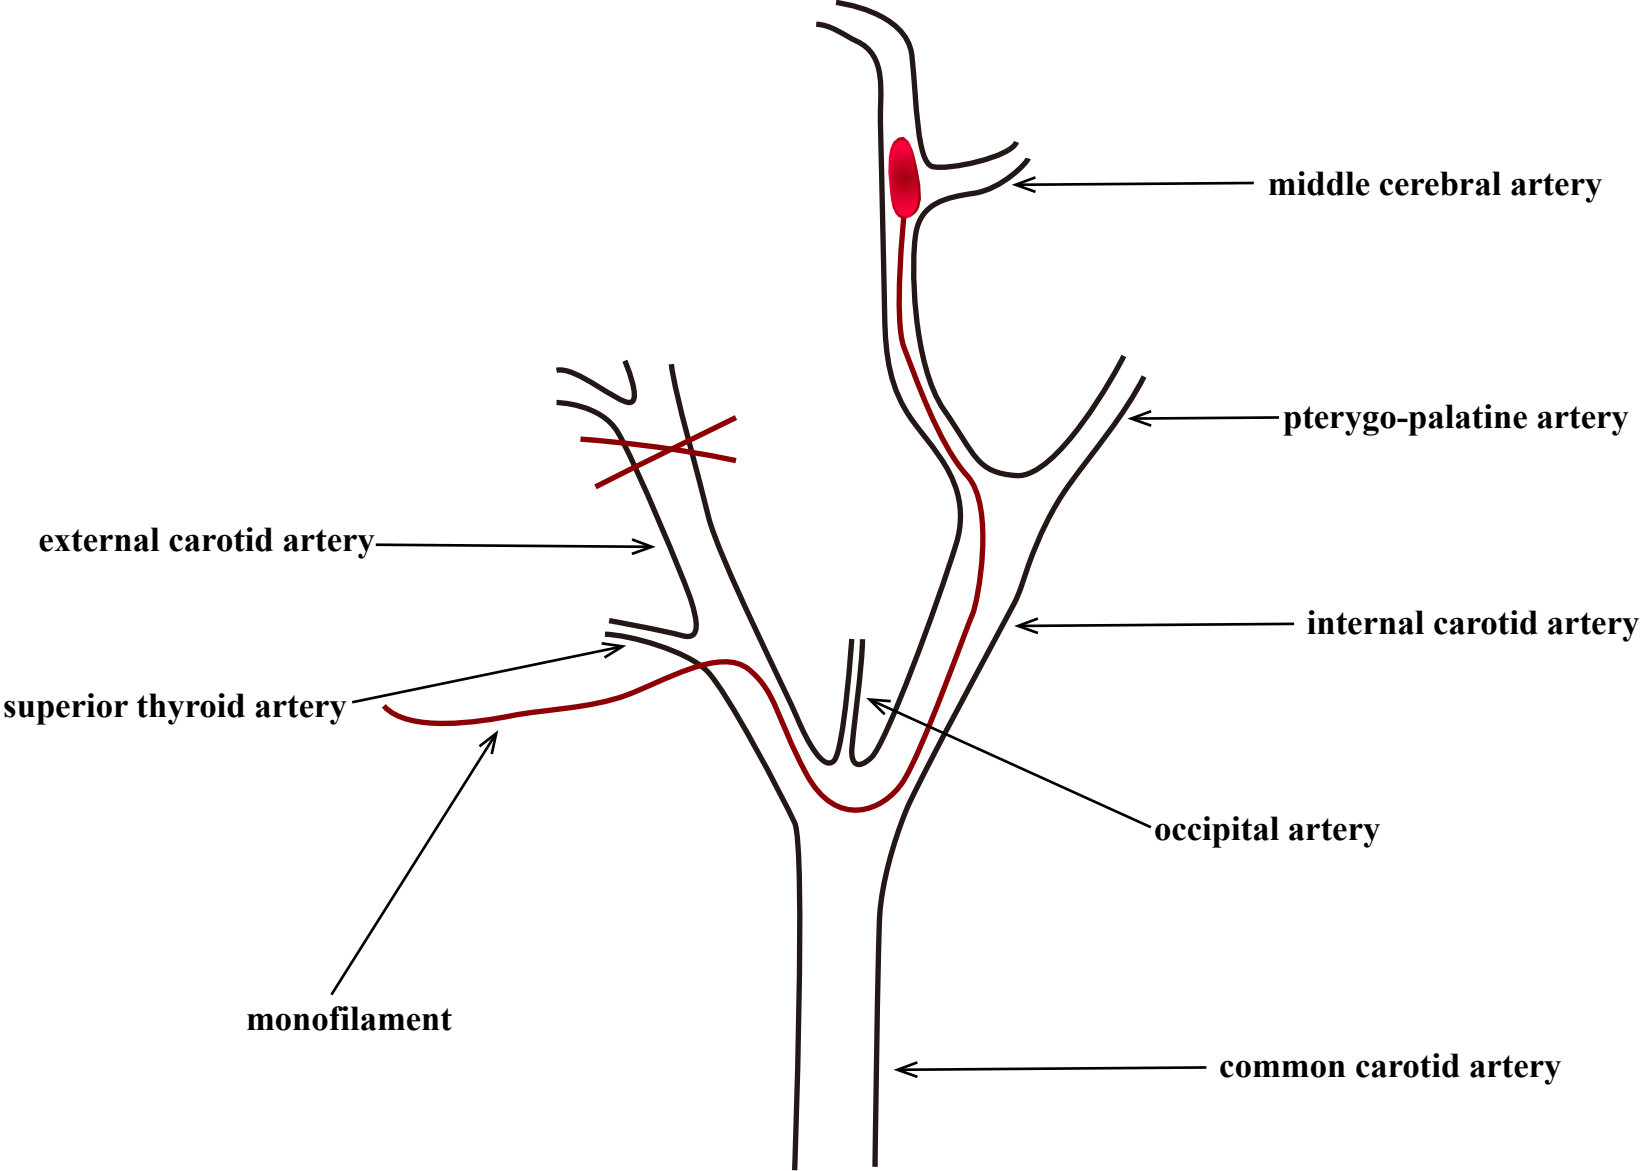

Supplement: f1 [file 3997947.f1.zip]

A

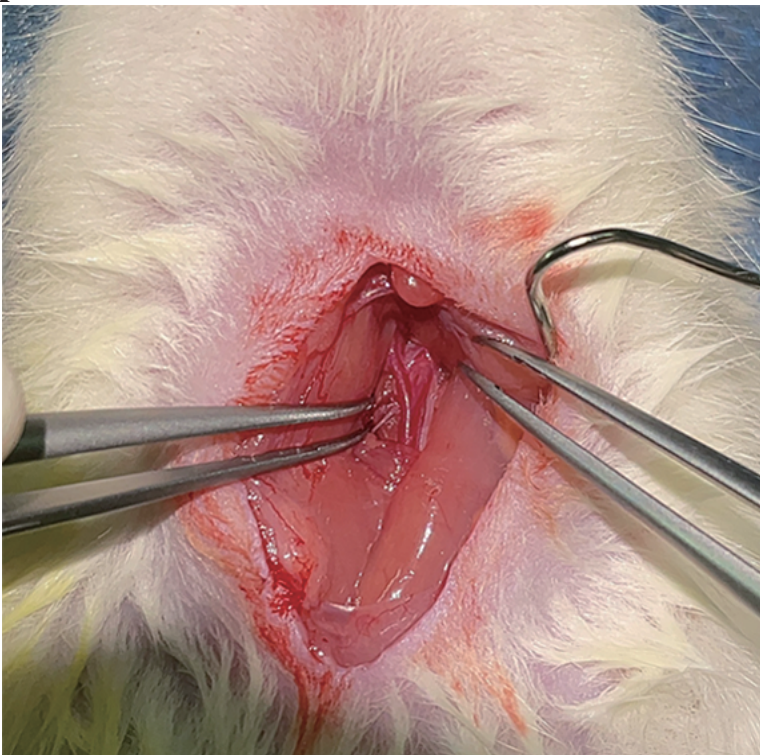

B

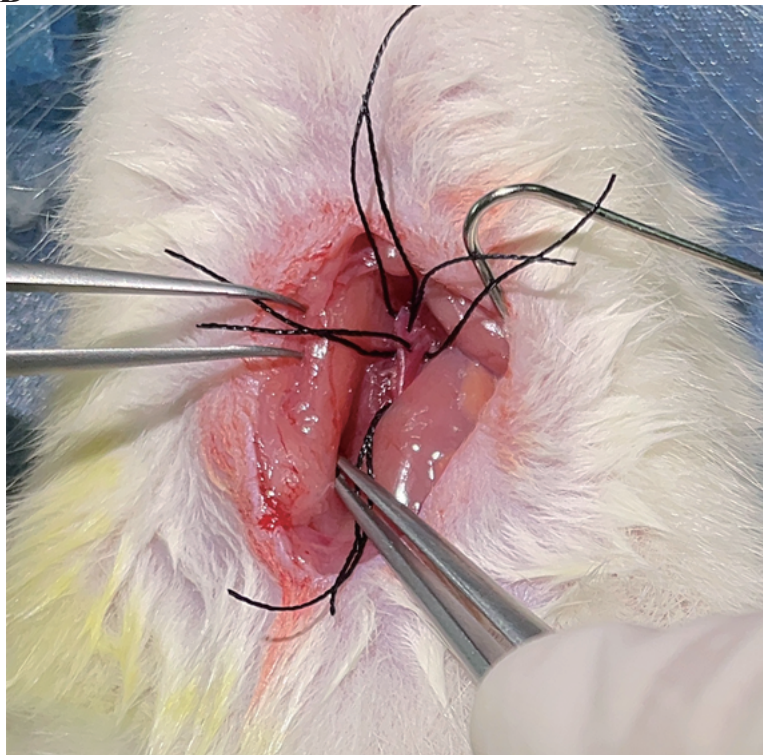

C

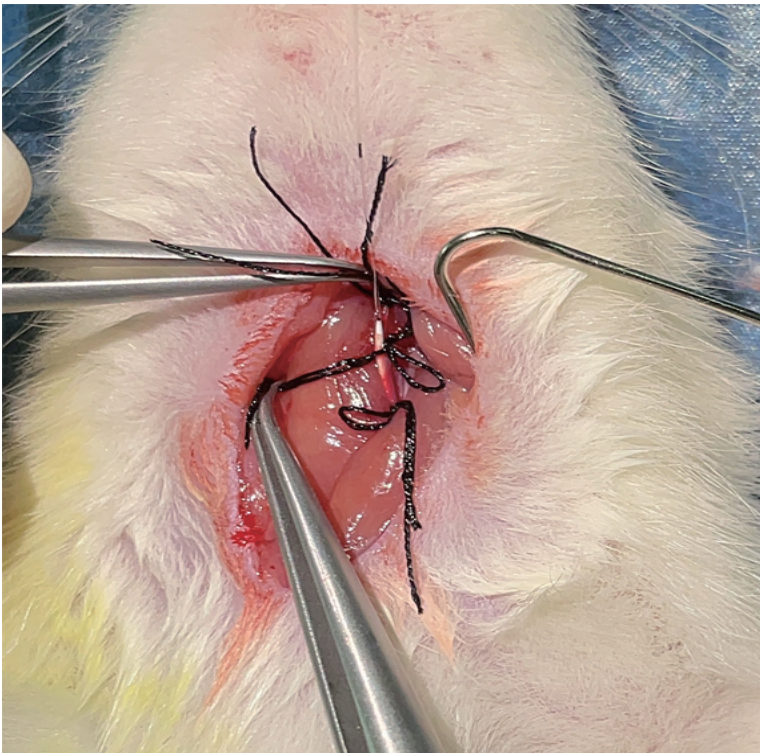

D

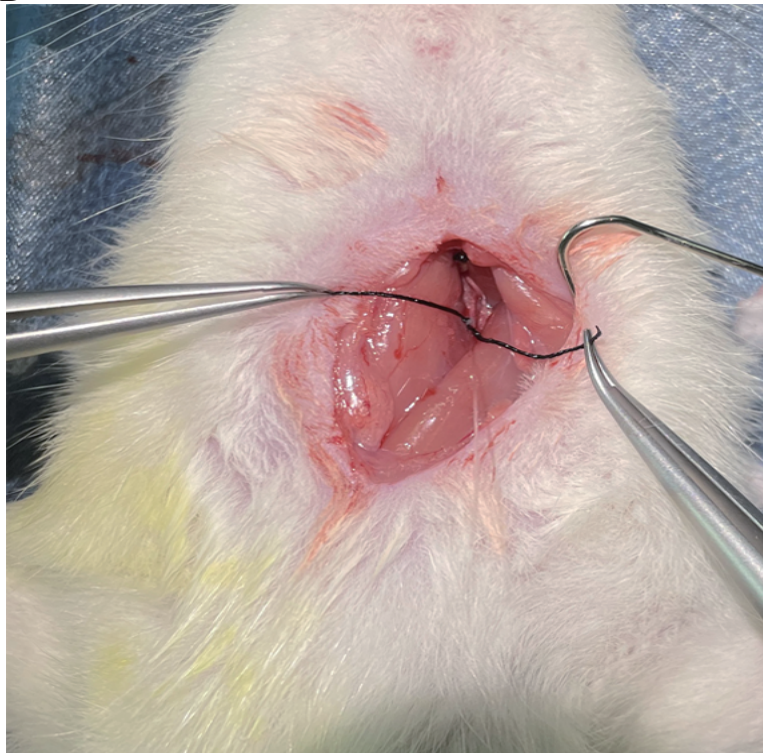

Supplement: f1 [file 3997947.f1.zip]
